# Supplementary material for: DNA aptamers that inhibit binding to human interleukin-17A and interleukin-20
Source: Royal Society of Chemistry journal article supplement (doi:10.1039/d6ra00178e), 2026-04-20
Supplement: d6ra00178e1.pdf [file d6ra00178e1.pdf]

## Supplemental Information for DNA Aptamers That Inhibit Binding to Human Interleukin-17A and Interleukin-20

Ali Parvez,<sup>a</sup> Kirsten Sully<sup>a</sup> and Dana A. Baum<sup>\*a</sup>

Department of Chemistry

Saint Louis University

3501 Laclede Avenue

St. Louis, MO, USA

[dana.baum@slu.edu](mailto:dana.baum@slu.edu)

### Table of Contents

|                                                                                      |    |
|--------------------------------------------------------------------------------------|----|
| Supplemental Experimental - Dimethyl Sulfate (DMS) probing.....                      | 1  |
| Supplemental Discussion - DMS Probing Analysis.....                                  | 1  |
| Table S1. Buffers used during SELEX.....                                             | 2  |
| Table S2. Sequencing results for cloning of IL-17 Aptamer Selections CS and CT.....  | 3  |
| Table S3. Sequencing results for cloning of IL-20 Aptamer Selections CY and CZ.....  | 4  |
| Table S4. Sequencing results for cloning of IL-20 Aptamer Selections DA and DB.....  | 5  |
| Table S5. Initial binding assays for IL-17 aptamer sequences.....                    | 6  |
| Table S6. Initial binding assays for IL-20 aptamer sequences.....                    | 7  |
| Table S7. Oligonucleotides used for fluorescence polarization studies.....           | 8  |
| Table S8. $K_d$ values for aptamers determined by fluorescence polarization.....     | 9  |
| Figure S1. Sequence alignment for 9CS and 9CT clones.....                            | 10 |
| Figure S2. Sequence alignment for 10CY, 10CZ, 10DA and 10DB clones.....              | 11 |
| Figure S3. Fluorescence polarization of IL-17 binding aptamers.....                  | 12 |
| Figure S4. Fluorescence polarization of IL-20 binding aptamers.....                  | 13 |
| Figure S5. Fluorescence polarization of IL-17 binding aptamers with mouse IL-17..... | 14 |
| Figure S6. DMS probing of aptamer 10CZ1.....                                         | 15 |
| Figure S7. Fluorescence polarization of aptamers with IL-24.....                     | 16 |



### **Supplemental Experimental - Dimethyl Sulfate (DMS) probing**

5' TAMRA-labeled 10CZ1 was incubated with increasing concentrations of IL-20 in appropriate binding buffer for 1 h at room temperature. 200  $\mu$ L of the resulting solution was then treated with 5  $\mu$ L of 10% v/v DMS at room temperature for 5 min. Reactions were quenched with 50  $\mu$ L of a stop solution containing 1.5 M sodium acetate (pH 7.0) and 1 M beta-mercaptoethanol. Following ethanol precipitation, the methylated aptamers were treated with 1 M piperidine at 95  $^{\circ}$ C for 10 min. The resulting cleavage products were analyzed via denaturing PAGE. Changes in cleavage patterns were determined by quantifying band intensities using Image Lab (Bio-Rad, Hercules, CA, USA) and comparing to the band intensities for cleavage of the folded aptamer without added IL-20.

### **Supplemental Discussion - DMS Probing Analysis**

In comparing the DMS cleavage patterns between folded 10CZ1 in the presence and absence of its IL-20 target, we observed pattern differences were localized to nucleotides 1 – 40 and focused our analysis on this region of the aptamer. Secondary structure prediction (shown in Figure S5) indicates nucleotides 41 – 100 can form a rather stable structure dominated an extended paired region with two loops. In future work, this region can likely be shortened. Our probing studies indicate that upon binding of IL-20, the region of the aptamer from A6 (As are also susceptible to DMS modification and cleavage, but to a lesser extent than Gs) to approximately G20 become less prone to cleavage, indicating protection from IL-20 binding. This is concurrent with the region containing G26 to approximately G37 becoming more prone to cleavage. We hypothesize that IL-20 binding disrupts the proposed structure and opens G26 – G37, with IL-20 interactions occurring with A6 – G20.

**Table S1. Buffers used during SELEX**

| Selection Buffer     | Composition                                                           |
|----------------------|-----------------------------------------------------------------------|
| Binding buffer CS/CY | 10 mM CaCl <sub>2</sub> , 1X PBS pH 7.4 , 0.02% Tween 20              |
| Binding buffer CT/CZ | 10 mM MgCl <sub>2</sub> , 1X PBS pH 7.4 , 0.02% Tween 20              |
| Binding Buffer CW/DA | 10 mM CaCl <sub>2</sub> , 20 mM Tris pH 7.4, 5 mM KCl, 0.02% Tween 20 |
| Binding Buffer CX/DB | 10 mM MgCl <sub>2</sub> , 20 mM Tris pH 7.4, 5 mM KCl, 0.02% Tween 20 |
| PBS Elution Buffer   | 1X PBS pH 7.4, 3.5 M urea, 10 mM EDTA, 0.02% Tween 20                 |
| Tris Elution Buffer  | 20 mM Tris pH 7.4, 3.5 M urea, 10 mM EDTA, 0.02% Tween 20             |

**Table S2. Sequencing results for cloning of IL-17 Aptamer Selections CS and CT**

|                      | <b>GAACTAGATCGCAGC</b> - Random Region - <b>GGATCGAGGTAATCC</b>           |
|----------------------|---------------------------------------------------------------------------|
| 9CS2                 | CCAACCGGTGACGCACAGTTAGCAACGAATCCCCTAGCCTCGATATGACAGTCATACCCGTGCGATGTGG    |
| 9CS3 <sup>a</sup>    | CTAATGCCCCGTACATAGCCACGCATACTGTTTTTCTAATAAAGCTCCTTGAGGTGAACCGTCGCTGGGTG   |
| 9CS5 <sup>b</sup>    | CCACAGCATCACCGTCTATCCGGCAGTGACACTTGAACCTTGCCCTTTTCCATCTTGTG               |
| 9CS6                 | CCCACGAGGGTTTATCTCCTACGTGCAACAAGTCCACTATAGGATCAGAGATGAGTTTGGTCGTGCAGTG    |
| 9CS9 <sup>c</sup>    | CCACGGGAGACGCATTAAGCCGATTCACTATCCCTACCCGTGGGACCGATCTAGGACCGGTGAGTGTGTG    |
| 9CS11                | CCACCAACCAAGGACCATAAGCAGGTCCAAC TAGGGCGGGCGATAGACAGCGGCACTGTTGTG CAGTTGGG |
| 9CS12                | CCCAGCAGGTTAAAGTGTAAGTAGCAACCAAAGGATACGATGTTTCTGGTAGTCCCTCGCCTCTCGGTG     |
| 9CS14a <sup>d</sup>  | CCACACACAATAGTCCGCTGCCACGAAACAGACCTAATGTCGTTTATAACGATTATATGTAGCTCCGTGG    |
| 9CS18                | CCCACGCACCGCGGCCTCACTGACATTATCTCTAAACCAGTTGACTAAAGCACCGTGCATTCACCTTGG     |
| 9CS19b <sup>d</sup>  | CCACGGCGGGACCCGCTAGACGGCAGGGGACTCTTGAACATATCCGTCTGACCGGTGTGGGG            |
|                      |                                                                           |
| 9CT1 <sup>e</sup>    | CTAATGCCCCGTACATAGCCACGCATACTGTTTTTCTAATAAAGCTCCTTGAGGTGAACCGTCGCTGGGTG   |
| 9CT2                 | CCCCCGGGTCACCGTTATAATCCGCTATCCAAAACCCGATTGACGTA CTGCTATTGAAGCCGGGAGCGTG   |
| 9CT3 <sup>b, f</sup> | CCACAGCATCACCGTCTATCCGGCAGTGACACTTGAACCTTGCCCTTTTCCATCTTGTG               |
| 9CT6                 | CCCAGGGACGAGTATGGCGACATGGGATGGCACTAGTCGGTTGTCCAAACACGTTGATTTGTCCCGGTG     |
| 9CT11                | CCAAGGTGTTAAGAGGCGTGTGCTGGAACCTCGTTCCATCACCGGAGGTTTTGACAAGACACTCTGTTGG    |
| 9CT12                | CACATCATATGAGTCCCATTCGGCAGTGA CTCTTGAACGCCGGGTCTTGATTGTGCTG               |
| 9CT13                | CCACGGGAGACGCATTAAGCCGATTCACTATCCCTACCCGTGGGACCGATCTAGGACCGGTGAGTGTGTG    |
| 9CT17                | CCACAGCATCACCGTTATCCGGAGTGACACTTGAACCTTGCCCTTTTCCATCTTGTG                 |
| 9CT18                | CCACAGTCACGACATCGCTTCGTGACATCACATACGTGATTTCACTACAATTGCTCCGTTTACCCCTTGTG   |
| 9CT19                | CCACCGACACACACCGTATATCCCTAGCCCCACATGAGGCCATCTCGCAACTGGACGTTGCTTCTGGG      |
| 9CT20                | CCTGTACATAGCCACGCATACTGTTTTTCTAATAAAGCTCCTTGAGGTGAACCGTCGCTGGGTG          |
| 9CT21                | CACACCAGTATAGGCCACAGTTGTGCTATACGAGATAAACCTATGCCACATTCCAACGTTCTCGCGTGTGG   |

<sup>a</sup>Sequence was found in 10 additional clones (9CS4, 10, 13, 14b, 15, 16, 19a, 20, 21, and 22)

<sup>b</sup>Sequence found in CS and CT clones

<sup>c</sup>Sequence found in 1 additional clone (9CS17)

<sup>d</sup>Plasmid contained more than one insert with different sequences, designated a and b.

<sup>e</sup>Sequence found in 1 additional clone (9CT16)

<sup>f</sup>Sequence found in 3 additional clones (9CT7, 14, and 15)

**Table S3. Sequencing results for cloning of IL-20 Aptamer Selections CY and CZ**

|                     | <b>GAACTAGATCGCAGC</b> - Random Region - <b>GGATCGAGGTAATCC</b>               |
|---------------------|-------------------------------------------------------------------------------|
| 10CY1               | CACCGGCGGAAGTGCGAAATCTGGGTTACGCAGGCACTCCTACGTCTCTCTCCCGACTGCGTTCGAGGTAACCTTGG |
| 10CY2               | CACACACGCCAGCCGACGACTCCACTTAGCTATACCAATATCTCAGCAAGTTAACGTACTACGCGGTCCC        |
| 10CY4               | ACGACGCGCTTACTTTTTACGATTATGAATGCCGCTAAATACTCCGCTGTCGCGTACTGCGGAAGCGCCCG       |
| 10CY5               | CGCGGGAATAGTGGCTAATACCGGGTGTATGCGACTGATGTATGCCCCGTGTACGGAAGGTCGGCGTTGTG       |
| 10CY6               | ACGACGCGCTTACTTTTTACGATTATGAATGCCGCTAAATACTCCGCTGTCGCGTACTGCAAAGCGCCCA        |
| 10CY7               | CACGGGAATAGGGGCTAATTCCGGGTGGAAGGCACTCAATTTGCCCCACGTACAAAGGTCGGCGGTCC          |
| 10CY8               | ACCCATTGGAGTAATCCACAGAAATTCGCGGCCACCTATTTATTCGGAGCCGAACACTTCTTCCTTGCCT        |
| 10CY9               | CACCCACAATCGATAAGATCTTACCTACCGACAAAGCGGTACACCAGGTATCTTGCCCTCTGCC              |
| 10CY10              | CTAATGCCCGTACATAGCCACGCATACTGTTTTCTAATAAAGCTCCTTGAGGTGAACCGTCGCTGGGTG         |
| 10CY11              | ACCACGGCCGACCATGTACAGGCGATAAACCTTCAATGTCACCTACGAGGACCGGGAACACTACTAATATG       |
| 10CY12              | CCCCACAGTGTGATCTAACCCGCCGCTTCCAGGAACCACATAGATGATAAGAGTTTCCCGCTGCCCGCC         |
| 10CY13              | CTAATGCCCGTACATAGCCACGCATACTGTTTTCTAATAAAGCTCCTTGAGGTGAACCGTCGCTGGGTG         |
| 10CY15              | CCCACAGCAGCCCTTGTTCCTGACTGGGGACGAGTCAAGAATTGAAGGCCTGAGTCAGTTCCCTATCCGTGTG     |
| 10CY16              | CCACGACACTATCTAGCAACTAAATGACCGACCTAAACAACCGTGTGGAGCCGTTCTCCTTCCGATATG         |
| 10CY17              | CCACGGGAGACGCATTAAGCCGATTCACCTATCCCTACCCGTGGGACCGATCTAGGACCGGTCAGTGTGTG       |
| 10CY18 <sup>a</sup> | ACGACGTTTTCTTATACTTATCCTCCCGGGTAGTGATGCTTACCGTTCAGAGGATTGTTGGGCCACGT          |
| 10CY19              | CACACCCCGACTCCCCAGATTGAAGTCTGTAGTATGTTATGACAGTGTAATCGTCTCATGGTTAGCCGT         |
|                     |                                                                               |
| 10CZ1               | GGCAGCACACGTCCAGTGTAGGCGTCATCCCTCTATCCAATCGTCGTTACAGCATTATCATGGGTTGTG         |
| 10CZ2               | CCAACACTCAGTAATGGTACGTAGCGGCACGCTAAGTGAGTAAGTACATTAGCTGTTTACCTCCAGTGTG        |
| 10CZ4               | CTAACGCCCGTACATAGCCACGCATACTGTTTTCTAATAAAGCTCCTCGAGGTGAACCGTCGCTGGGTG         |
| 10CZ6               | CATGTGGGTTTTCTCTGAAGCAACCCATCCGATCTACCTATAATTCTTTGACTAAATGAAGTTCGCCCGG        |
| 10CZ7               | CAGAAGTGGCTCGTGCTTAGTCTACCAGTGAATGTGAGATTATAGTACCGTCTACTTGGCCGTCCC            |
| 10CZ8               | CTAATGCCCGTACATAGCCACGCATACTGTTTTCTAATAAAGCTCCTTGAGGTGAACCGTCGCTGGGTG         |
| 10CZ9               | AGGGCAAAAATAGGTTTATCCGTAAGTCAACTAAGTTATAATTTCTCCGTTAGTAGGTGGGAACTTTCA         |
| 10CZ10              | CTAATGCCCGTACATAGCCACGCATACTAATAAAGCTCCTTGAGGTGAACCGTCGCTGGGTG                |
| 10CZ11              | CCACAGGCTCAACATTCAATCCGAACGAAACCTTCCTAAGTGCATCTCTTGGCGTCAACTGCGGCC            |
| 10CZ12              | CAAGCGGTGACCATGTTGGTTGGAGCTTCTTACCGCGTGTACCAGTGTGTATCTGGTCTGGAGCATGG          |
| 10CZ13              | CTACCCCGTCTGGAGAGTTTTTTCAGCATGGTTACACAATACGTATAACAGCTTCCCCAGCGGGTTGCC         |
| 10CZ14 <sup>b</sup> | CAGAAGACAGCATTTAGTACATTGGAGCAGTCGGCCAGTTATGTAGATTCAACCATCAGTAAACGCTC          |
| 10CZ16              | ACCACACTACAACGTAGCCTACAGGGCCAAAGTATAGCCATGCCGTCCGATTCGGTCTGCTTACCCC           |
| 10CZ17              | CAGCAGGTATAGGTATCACTGACAGCTATTCGCGCACTAAGGAAGTTACAGCATTTATATGACGCACCCC        |
| 10CZ18              | CACACCCGAGGCTACAAATGAGACAGGGTGGCAATATCCAGAAGTGTGGTGATACATTGCAGCCTAGG          |
| 10CZ20              | CCACGGGAGACGCATTAAGCCGATTCACCTATCCCTACCCGTGGGACCGATCTAGGACCGGTCAGTGTGTG       |

<sup>a</sup>Sequence was found in 1 additional clone (10CY20)

<sup>b</sup>Sequence was found in 1 additional clone (10CZ19)

**Table S4. Sequencing results for cloning of IL-20 Aptamer Selections DA and DB**

|                    | <b>GAACTAGATCGCAGC</b> - Random Region - <b>GGATCGAGGTAATCC</b>              |
|--------------------|------------------------------------------------------------------------------|
| 10DA1              | ATGCACGCACATGATAAAGCCCGAGGACGTATTAATGATGTGGAACCGGGAATTTGTTACAACGGCTGGG       |
| 10DA4              | CCGCGCTCTCCGATCGGCGCCGTGAATAACGACGAAACCCGAGTCTTTGGGTCGAGACGTTAAGCTCGGTTCTAT  |
| 10DA6              | CCGCGGATCGCTTTTGGCTAGCTGTAGCTCCGCGGAACAGCGTCTGCTTAGGGGATCTAGGCCGGGGTG        |
| 10DA7              | CACCACAGTTACCGATCGACATTCCACTTGACACTCCCCCTGTATCCCGTGTGCTCCACTCGTCCTGGTG       |
| 10DA9              | CACAGCACGTCCACCAGACATAAATAGTCACCAAGGAGGTCCATACGATTCGCAAGCCCAGCATTTGTCCG      |
| 10DA10             | CTCCCCTGGACCTAGGGATTGCGAGGTGAATGATCTGTAGTAGCTCGTACGACGCGAGCTTATTGGCGTGA      |
| 10DA11             | CACGACACCTACCACACCTTATCTCACCGTTTATTCTGATCAGCTCTCAACCAGCATGCCCGGCTATCG        |
| 10DA13             | CACCAGGGTATGTAAACGGCGAGCTGAGATATCAACGGACAATTAAACATTGATGCGACTCACCCATGCA       |
| 10DA14             | CACAACTACGTGATCAACGAGGAAATATAAGCAAATAGACGGAAATTCAAACTAAATCAGACTTAGTCCC       |
| 10DA16             | CACAGCATCGAGGGGGTAAGACCCACGTCACAGTAACTCATGGAACCTCACACAATGATCTCCCGTCCC        |
| 10DA17             | GAGCAAAGTCTAAGAGTTTCACCATGGCGGACCCCACTCACTACTCGAATATTAACCCGAGCGTATTCTCCTGCC  |
| 10DA18             | CCACCCGCATAGCGCAGCATACGAACCCCGAGGATCGATACAACGGGGCTACGACATAAAGTACTATTAG       |
|                    |                                                                              |
| 10DB1              | CGGCACGAACACGATGTTCCCTCGTTAGTTTATTAGTCCGACACGAGGGCTCGCCCCGTACTATGGTCCAGTG    |
| 10DB2              | CGGCACGAACACGATGTTCCCTCATTAGTTTATTAGTCCACACAGGGCTCACCCCGTACTATGGTCCAGTG      |
| 10DB5 <sup>a</sup> | CACACAGAACAACCTGAATACGAGGGCCGGTCCCGTATTAAATCCCTCGAGTGTGTAGATCACGATTAC        |
| 10DB6              | CTACCGACAACGCACCGTCAACCAATGAATTATCCGATTCCATTCACCTCTTTGTAGACGACGTCCCC         |
| 10DB7              | CCAGCGCGCGGGAACGTCATGTAAGTGTTCCTCAATCTACTAACGGATATACTTTTCGTATACGGACCAG       |
| 10DB8              | CCAACCGGGTAACTAATCATGAAGAATTCGAATGCTATAACGGAGAGTCTGCCGATCACGTCGTGCTT         |
| 10DB9              | ACGCAGTTACACCTCACATATTGTTCAAACCTCCACATCGTTCACCAGAACTCGCCAGTTCCTCCGGCAT       |
| 10DB10             | TATACTCGCCTACGAAAAGTAAATTTTCATCACCACTTACGATTCGGGCGAACCTCACGTACATTGGGGC       |
| 10DB13             | CAAACGCCACGATACCCACTATAAGTCGCCGGCCTCCCAATCAACGCCGCACGACGCTCTATACTCCCCAG      |
| 10DB14             | CCACACCTACTACAGCCGTCTAAAGACACACATGGGTGAAATTCAGACACCGGGCGCCACCCCTGCGGGGGC     |
| 10DB15             | CCACACACTATGAACCTAGCGGCCGTGTCTATTACGGTGCCCGAGCTCTCTCGTACTACGGACTGCCCGAGTCTCA |
| 10DB16             | CAGTAACCTGCATTTGTGAACTAAACATGCCGAGCATAGCGGATACTGTGGTCACTGTTGCCACAGTAGG       |
| 10DB17             | GGAACCGGCCACCCAAATCGATTGGAAGGTCAGATCTGTGGAGGAATATGAGGGCTGCGAACGCAATAG        |
| 10DB18             | CGAGCTCCCTAGTGCACATCTACACCATGTCAATACGACCTCTGCGTGTAGTTAATAAATGATCGACTA        |
| 10DB19             | ACCACGACCGGCAGTGTACATCGGAGCTTAATAAGCTCTCTTCGAATGGTAATTACTATTACGTCAGTAC       |
| 10DB20             | CAGCCGTGACAAACCTTCTCTGTAAACTCCCGGTCTAGTTCCTAGACACTTCGCCATTAGCTAGTG           |

<sup>a</sup>Sequence found in 1 additional clone (10DB11)

**Table S5. Initial binding assays for IL-17 aptamer sequences**

| Sequence | Wash | Elution |
|----------|------|---------|
| 9CS2     | 4    | 96      |
| 9CS3     | 7    | 93      |
| 9CS5     | 2    | 98      |
| 9CS6     | 6    | 94      |
| 9CS9     | 5    | 95      |
| 9CS11    | 6    | 94      |
| 9CS12    | 7    | 93      |
| 9CS14a   | 13   | 87      |
| 9CS18    | 2    | 98      |
| 9CS19b   | 10   | 90      |
| 9CT1     | 24   | 76      |
| 9CT2     | 37   | 63      |
| 9CT3     | 38   | 62      |
| 9CT6     | 31   | 69      |
| 9CT11    | 45   | 55      |
| 9CT12    | 15   | 85      |
| 9CT13    | 31   | 69      |
| 9CT17    | 45   | 55      |
| 9CT18    | 43   | 57      |
| 9CT19    | 30   | 70      |
| 9CT20    | 51   | 49      |
| 9CT21    | 46   | 54      |

**Table S6. Initial binding assays for IL-20 aptamer sequences**

| Sequence <sup>a</sup> | Wash | Elution |
|-----------------------|------|---------|
| 10CY2                 | 57   | 43      |
| 10CY5                 | 24   | 76      |
| 10CY6                 | 29   | 71      |
| 10CY7                 | 21   | 79      |
| 10CY9                 | 31   | 69      |
| 10CY10                | 43   | 57      |
| 10CY11                | 43   | 57      |
| 10CY12                | 35   | 65      |
| 10CY13                | 39   | 61      |
| 10CY16                | 27   | 73      |
| 10CY17                | 32   | 68      |
| 10CY18                | 30   | 70      |
| 10CY19                | 79   | 21      |
| 10CZ1                 | 16   | 84      |
| 10CZ4                 | 46   | 54      |
| 10CZ6                 | 24   | 76      |
| 10CZ8                 | 33   | 67      |
| 10CZ10                | 43   | 57      |
| 10CZ12                | 49   | 51      |
| 10CZ13                | 31   | 69      |
| 10CZ14                | 60   | 40      |
| 10CZ16                | 53   | 47      |
| 10CZ17                | 45   | 55      |
| 10DA1                 | 78   | 22      |
| 10DA6                 | 23   | 77      |
| 10DA7                 | 5    | 95      |
| 10DA10                | 31   | 69      |
| 10DA11                | 24   | 76      |
| 10DA14                | 21   | 79      |
| 10DA16                | 26   | 74      |
| 10DA17                | 39   | 61      |
| 10DA18                | 17   | 83      |
| 10DB1                 | 32   | 68      |
| 10DB7                 | 51   | 49      |
| 10DB8                 | 65   | 35      |
| 10DB10                | 40   | 60      |
| 10DB13                | 23   | 77      |
| 10DB14                | 58   | 42      |
| 10DB15                | 33   | 67      |
| 10DB16                | 36   | 64      |
| 10DB17                | 29   | 71      |
| 10DB18                | 32   | 68      |

<sup>a</sup>Clones that were sequenced, but not included in table failed to produce sufficient PCR product for testing.

**Table S7. Oligonucleotides used for fluorescence polarization studies**

|                                        | <b>Sequence</b>                                                                                       |
|----------------------------------------|-------------------------------------------------------------------------------------------------------|
| <b>9CS2</b>                            | GAACTAGATCGCAGCCCAACCGGTGACGCACAGTTAGCAACGAATCCCCTAGCCTCGATATGACAGTCATACCCGTCGCATGTGGGGATCGAGGTAATCC  |
| <b>9CS3</b>                            | GAACTAGATCGCAGCCTAATGCCGTACATAGCCACGCATACTGTTTTTCTAATAAAGCTCCTTGAGGTGAACCGTCGCTGGGTGGGATCGAGGTAATCC   |
| <b>9CT6</b>                            | GAACTAGATCGCAGCCCCAGGGACGAGTATGGCGACATGGGATGGCACTAGTCGGTTGTCCAAACACGTTGATTTGTCCCCGGTGGGATCGAGGTAATCC  |
| <b>9CT19</b>                           | GAACTAGATCGCAGCCACCCACACACACCCGTATATCCCCTAGCCCCACATGAGGCCATCTCGCAACTGGACGTTTCGCTTCTGGGGATCGAGGTAATCC  |
| <b>9CT20</b>                           | GAACTAGATCGCAGCCCTGTACATAGCCACGCATACTGTTTTTCTAATAAAGCTCCTTGAGGTGAACCGTCGCTGGGTGGGATCGAGGTAATCC        |
| <b>9CT21</b>                           | GAACTAGATCGCAGCCACACCAGTATAGGCCACAGTTGTGTATACGAGATAAACCTATGCCACATTCCAACGCTTTCGCGTGTGGGGATCGAGGTAATCC  |
| <b>Aptamer 1 from Ref 15</b>           | GCTGTGTGACTCCTGCAACTGGATTGTATGATCTGTCAGGAGCACCGTCTGAGGGTACACACGCCTATGACCTGTGCAGCTGTATCTTGTCTCC        |
| <b>Truncated Aptamer 1 from Ref 15</b> | ATACAACCTGGATTGTAT                                                                                    |
| <b>Aptamer 2 from Ref 15</b>           | GCTGTGTGACTCCTGCAATTAACCTGTTTTCTTTTTGTTTTTATGTTGTTGGCTTTTTCTTTTTGCAGCTGTATCTTGTCTCC                   |
| <b>Truncated Aptamer 2 from Ref 15</b> | CGACTAACTGTTTTCTTTTTGTTTTTAGTCG                                                                       |
| <b>10cy7</b>                           | GAACTAGATCGCAGCCACGGGAATAGGGCTAATTCCGGGTGGAAGGCACTCAATTTGCCCCACGTACAAAGGTCGGCGGTCCGGATCGAGGTAATCC     |
| <b>10Cz1</b>                           | GAACTAGATCGCAGCGGCAGCACACGTCCAGTGTAGGCGTCATCCCTCTATCCAATCGTCGTTACAGCATTATCATGGGTTGTGGGATCGAGGTAATCC   |
| <b>10DA7</b>                           | GAACTAGATCGCAGCCACCACAGTTACCGATCGACATTCCACTTGACACTCCCCCTGTATCCCGTGTGCTCCACTCGTCCTGGTGGGATCGAGGTAATCC  |
| <b>10DA14</b>                          | GAACTAGATCGCAGCCACAACCTACGTGATCAACGAGGAAATATAAGCAAATAGACGGAATTCCAAATAAATCAGACTTAGTCCCAGGATCGAGGTAATCC |
| <b>10DA18</b>                          | GAACTAGATCGCAGCCACCCGCATAGCGCAGCATAACGAACCCCGAGGATCGATACAACGGGCTACGACATAAAGTACTATTAGGGATCGAGGTAATCC   |
| <b>10DB13</b>                          | GAACTAGATCGCAGCCAAACGCCACGATACCCACTATAAGTCGCCGGCCTCCAATCAACGCCGCACGCACGCTCTATACTCCCCAGGGATCGAGGTAATCC |

**Table S8.  $K_d$  values for aptamers determined by fluorescence polarization**

| Aptamer                         | Target | $K_d$           |
|---------------------------------|--------|-----------------|
| 9CS2                            | IL-17  | 4.2 nM          |
| 9CS3                            | IL-17  | 9.9 nM          |
| 9CS6                            | IL-17  | ND <sup>a</sup> |
| 9CS9                            | IL-17  | ND              |
| 9CS18                           | IL-17  | ND              |
| 9CS19b                          | IL-17  | ND              |
| 9CT3                            | IL-17  | ND              |
| 9CT6                            | IL-17  | 12.5 nM         |
| 9CT11                           | IL-17  | ND              |
| 9CT19                           | IL-17  | 5.3 nM          |
| Aptamer 1 from Ref 15           | IL-17  | ND              |
| Truncated Aptamer 1 from Ref 15 | IL-17  | ND              |
| Aptamer 2 from Ref 15           | IL-17  | 3.1 nM          |
| Truncated Aptamer 2 from Ref 15 | IL-17  | 2.5 nM          |
| 10CY7                           | IL-20  | 0.3 $\mu$ M     |
| 10CZ1                           | IL-20  | 0.1 $\mu$ M     |
| 10DA7                           | IL-20  | >1.3 $\mu$ M    |
| 10DA14                          | IL-20  | >22.0 $\mu$ M   |
| 10DA18                          | IL-20  | 0.2 $\mu$ M     |
| 10DB13                          | IL-20  | 1.0 $\mu$ M     |

<sup>a</sup>ND = Not determined. In these cases, aptamer binding curves were not consistent with single binding events.

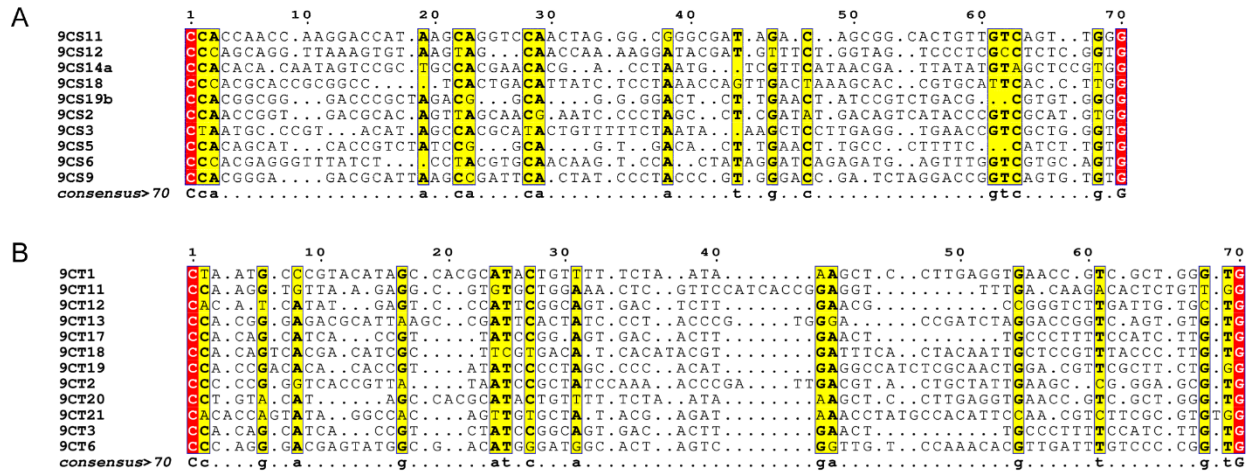

**Figure S1. Sequence alignment for 9CS and 9CT clones.** The unique sequence regions for the clones from selection 9CS (A) and 9CT (B) were aligned using T-Coffee<sup>18,19</sup> and displayed using N\*ESPRIT.<sup>20</sup> Duplicate clone sequences and the primer binding regions were not included in the alignments.

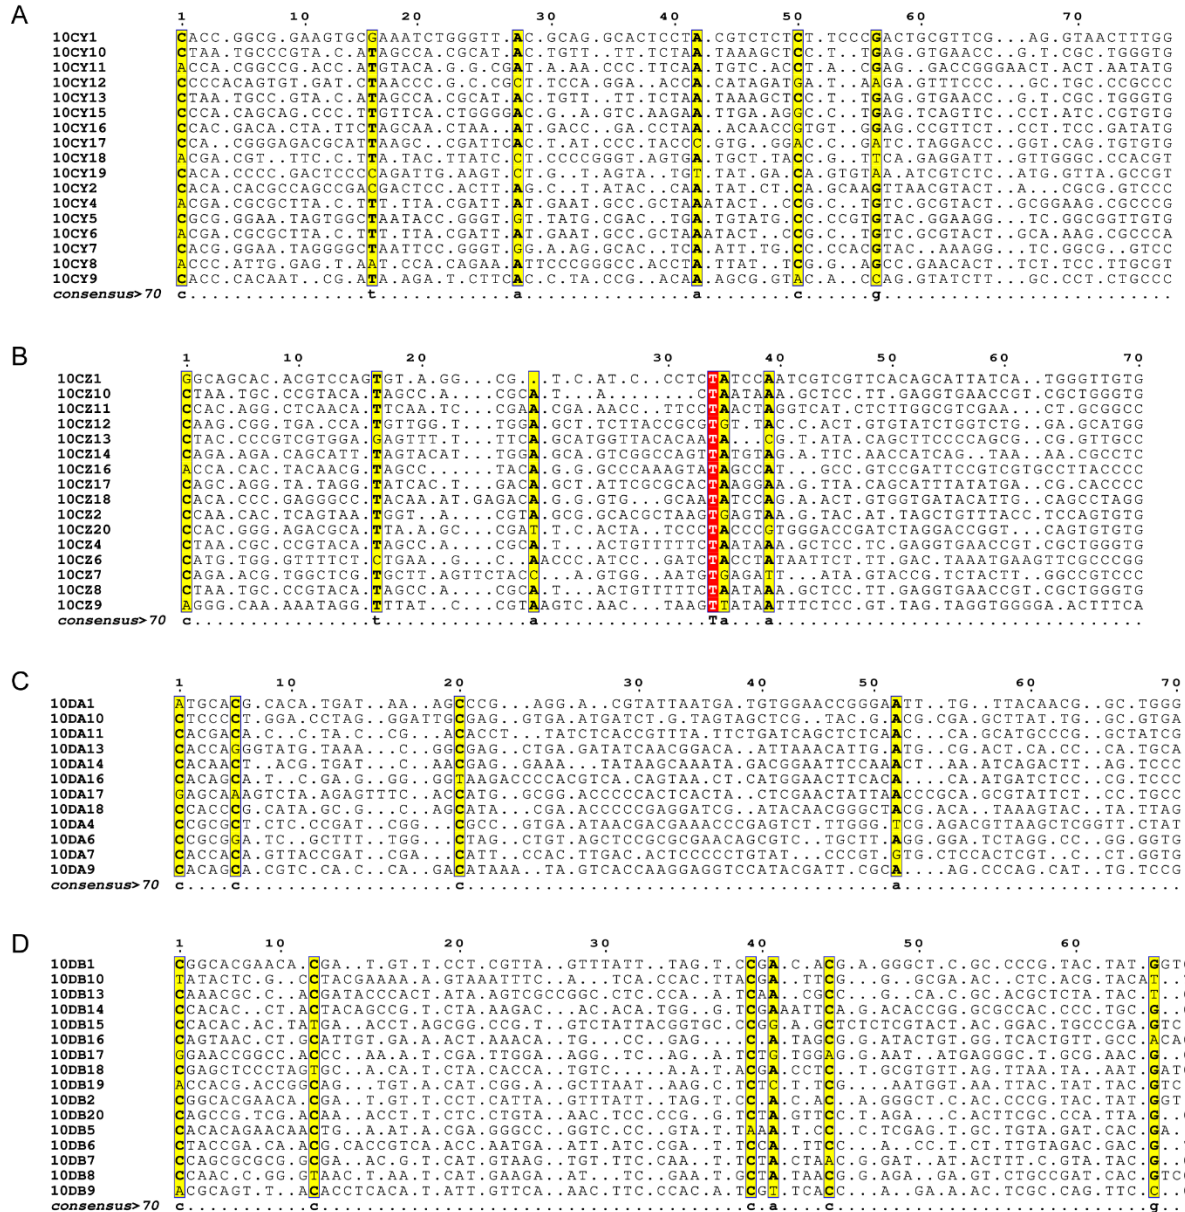

**Figure S2. Sequence alignment for 10CY, 10CZ, 10DA and 10DB clones.** The unique sequence regions of the clones sequenced from selection 10CY (A), 10CZ (B), 10DA (C) and 10DB (D) were aligned using T-Coffee<sup>18,19</sup> and displayed using N\*ESPRIT<sup>20</sup>. Duplicate clone sequences and the primer binding regions were not included in the alignments.

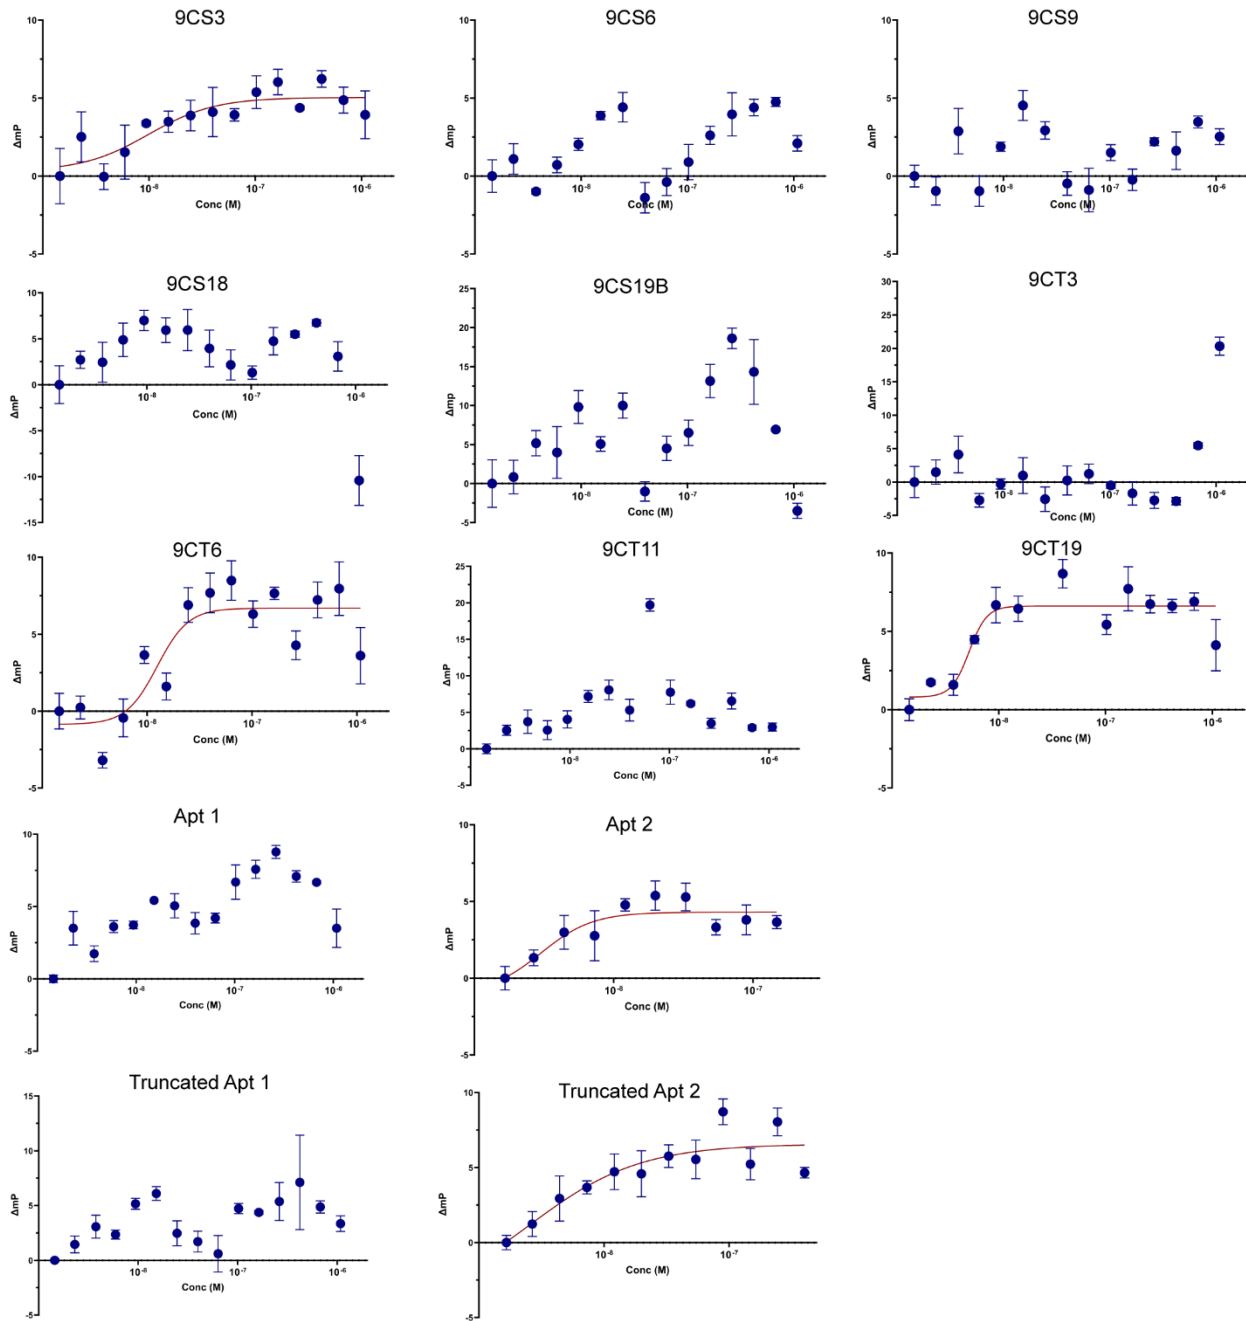

**Figure S3. Fluorescence polarization of IL-17 binding aptamers.** Binding constants were determined from non-linear fits using GraphPad Prism as described. Aptamers lacking curve fits appeared to have unusual binding behavior, potentially due to binding of two monomers of IL-17. Error bars represent the standard deviation for N=3 trials.

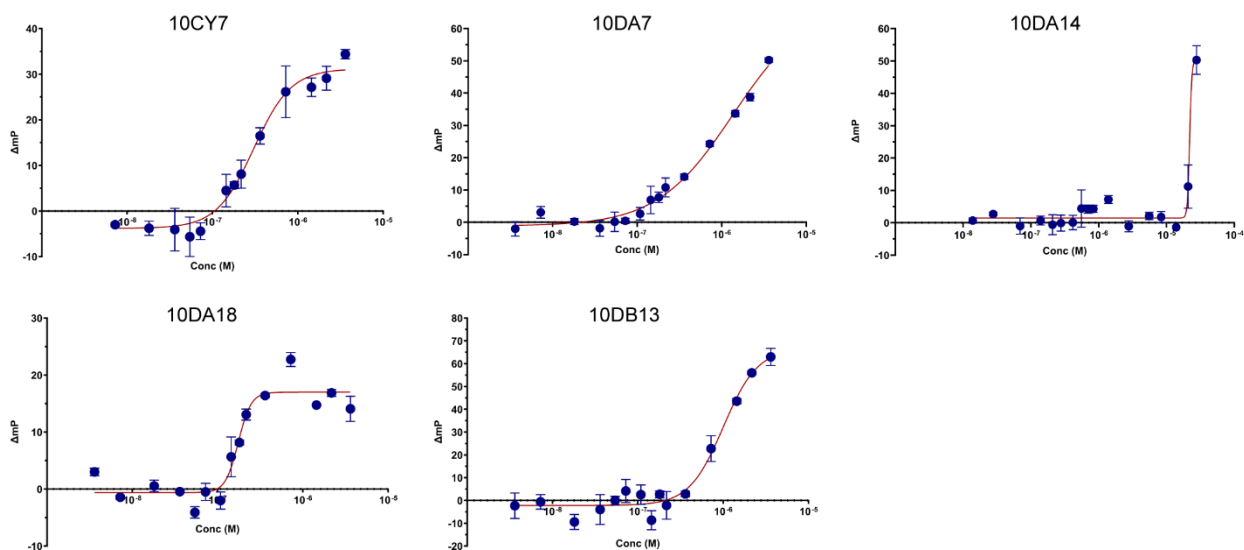

**Figure S4. Fluorescence polarization of IL-20 binding aptamers.** Binding constants were determined from non-linear fits using GraphPad Prism as described. Error bars represent the standard deviation for N=3 trials.

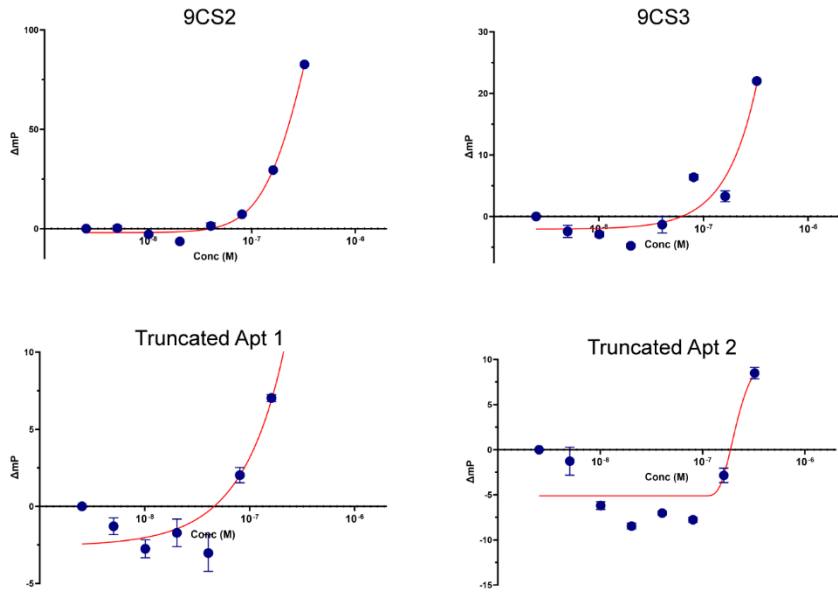

**Figure S5. Fluorescence polarization of IL-17 binding aptamers with mouse IL-17** Binding curves were plotted with non-linear fits using GraphPad Prism as described. Error bars represent the standard deviation for N=3 trials.

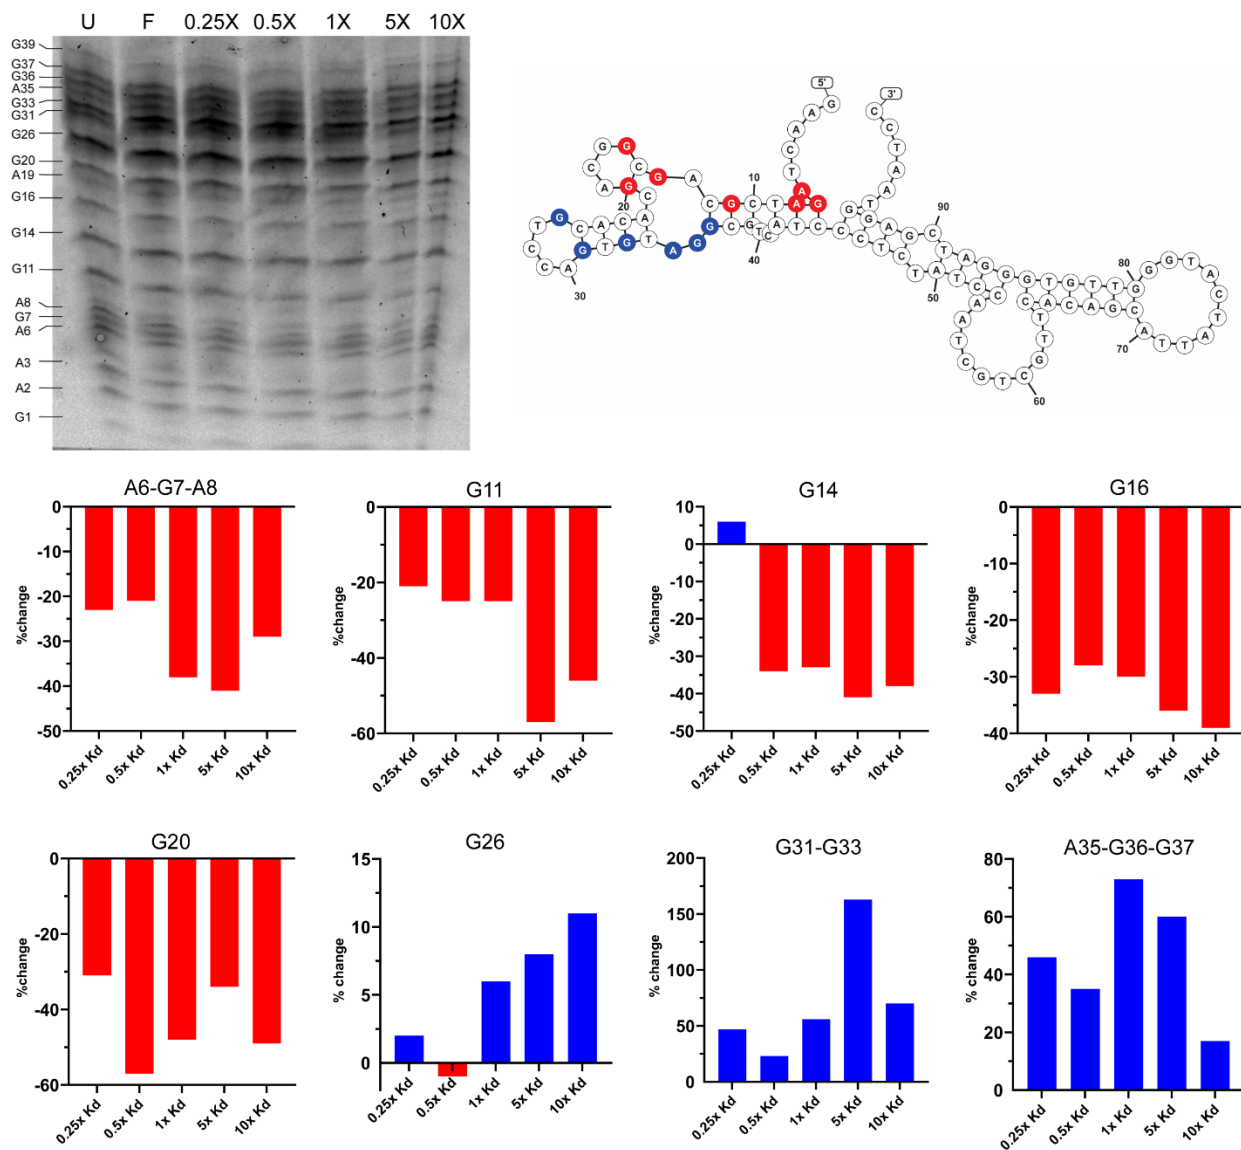

**Figure S6. DMS probing of aptamer 10CZ1.** 5' TAMRA-labeled 10CZ1 was incubated with increasing concentrations of IL-20 and DMS cleavage patterns were compared to unfolded (U) and folded (F) aptamer without IL-20. K<sub>d</sub> for aptamer 10CZ1 was determined to be 120 nM via fluorescence polarization. The percent change refers to the change in band intensity relative to the folded aptamer lane. Increased cleavage, resulting in a stronger band intensity, is shown in blue, while decreased cleavage is represented in red. In some cases, groups of bands were quantified as a single unit. Gel image was analyzed using Image Lab. Secondary structure prediction was generated with SnapGene® software (from Dotmatics; available at [snapgene.com](http://snapgene.com)).

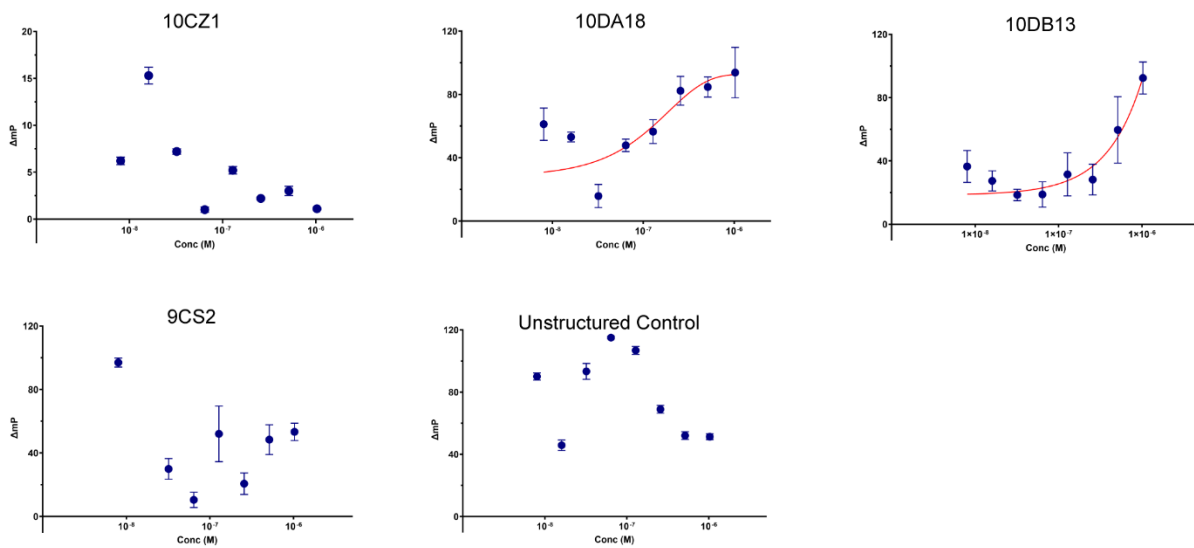

**Figure S7. Fluorescence polarization of aptamers with IL-24** Binding curves were plotted with non-linear fits using GraphPad Prism as described. Error bars represent the standard deviation for N=3 trials.
